# Supplementary material
Source: HighWire-hosted journal article supplement (https://bmjopen.bmj.com/content/8/10/e022947)
Supplement: inline-supplementary-material-1 [file inline-supplementary-material-1.pdf]

**Supplementary table 1:** Additional selected variables associated with self-rated health; prevalence and odds ratios [95% CI], adjusted for sex and age (continuous).

|                                                                                         |                  | Self-rated health in % |                   | OR adjusted<br>[95 % CI] |
|-----------------------------------------------------------------------------------------|------------------|------------------------|-------------------|--------------------------|
|                                                                                         |                  | less than<br>good/bad  | good/very<br>good |                          |
| Relocation experience<br>(n=571, n <sub>adj</sub> =562)                                 | No               | 82.2                   | 92.1              | reference                |
|                                                                                         | Yes              | 17.8                   | 8.0               | 1.74 [0.91; 3.32]        |
| Country of birth (n=591,<br>n <sub>adj</sub> =582)                                      | Russia           | 38.4                   | 35.8              | reference                |
|                                                                                         | Kazakhstan       | 44.8                   | 49.7              | 0.70 [0.47; 1.05]        |
|                                                                                         | Other            | 16.7                   | 14.5              | 1.38 [0.79; 2.42]        |
| Age at immigration (n=587,<br>n <sub>adj</sub> =581)                                    | ≤10 years        | 0.4                    | 1.6               | 2.75 [0.26; 28.64]       |
|                                                                                         | 11-20 years      | 1.8                    | 15.9              | 5.05 [1.62; 15.68]       |
|                                                                                         | 21-30 years      | 9.7                    | 27.6              | 2.22 [1.20; 4.11]        |
|                                                                                         | 31-40 years      | 30.5                   | 26.2              | reference                |
|                                                                                         | 41-50 years      | 28.3                   | 18.5              | 1.03 [0.61; 1.76]        |
|                                                                                         | 51-60 years      | 20.8                   | 6.2               | 0.70 [0.30; 1.63]        |
|                                                                                         | ≥61 years        | 8.6                    | 3.6               | 1.30 [0.42; 4.10]        |
| Number of residential changes in<br>Germany (n=560, n <sub>adj</sub> =554) <sup>b</sup> | ≤3               | 80.5                   | 91.5              | reference                |
|                                                                                         | >3               | 19.5                   | 13.8              | 0.44 [0.25; 0.77]        |
| Family size at time of arrival<br>(n=586, n <sub>adj</sub> =577) <sup>a</sup>           | ≤2 people        | 25.0                   | 16.1              | reference                |
|                                                                                         | 3-4 people       | 34.8                   | 50.7              | 1.58 [0.97; 2.55]        |
|                                                                                         | ≥5 people        | 40.2                   | 33.2              | 1.08 [0.66; 1.77]        |
| Family size (n=588,<br>n <sub>adj</sub> =579)                                           | single           | 21.4                   | 8.8               | 0.76 [0.44; 1.32]        |
|                                                                                         | 2 persons        | 53.9                   | 38.0              | reference                |
|                                                                                         | ≥3 persons       | 24.6                   | 53.3              | 1.41 [0.91; 2.19]        |
| Alcohol (n=569, n <sub>adj</sub> =551) <sup>b</sup>                                     | Never            | 13.7                   | 9.1               | 0.72 [0.32; 1.64]        |
|                                                                                         | Stopped drinking | 14.9                   | 6.7               | 1.43 [0.78; 2.65]        |
|                                                                                         | Drinking alcohol | 71.4                   | 84.2              | reference                |
| Smoking (n=581, n <sub>adj</sub> =572)                                                  | Never            | 67.3                   | 61.8              | reference                |

|                                    |      |      |                   |
|------------------------------------|------|------|-------------------|
| Stopped smoking                    | 17.5 | 22.2 | 1.03 [0.60; 1.75] |
| Less than 10 cigarettes<br>per day | 4.0  | 8.5  | 1.31 [0.57; 3.03] |
| 10 or more cigarettes<br>per day   | 11.3 | 7.5  | 0.39 [0.20; 0.78] |

---

<sup>a</sup> age modeled non-linear as  $\text{age}^{-1}$  in the age and sex adjusted model

<sup>b</sup> age modeled non-linear as  $\text{age}^{-2}$  in the age and sex adjusted model
